# Supplementary material for: Sea urchin TiO2–nanoparticle hybrid composite photoelectrodes for CdS/CdSe/ZnS quantum-dot-sensitized solar cells
Source: Royal Society of Chemistry journal article supplement (doi:10.1039/c2cp24106d), 2012-01-01
Supplement: c2cp24106d.pdf [file c2cp24106d.pdf]

## Electronic Supplementary Information

### **Sea urchin TiO<sub>2</sub>-nanoparticle hybrid composite photoelectrode for CdS/CdSe/ZnS quantum dot-sensitized solar cells**

Eui-Hyun Kong<sup>a</sup>, Yong-June Chang<sup>a</sup>, Yoon-Cheol Park<sup>a</sup>, Yeon-Hee Yoon<sup>a</sup>, Hyun-Jin Park<sup>b</sup>,  
and Hyun Myung Jang<sup>a\*</sup>

<sup>a</sup>Laboratory of Multiferroic and Photovoltaic Nanostructures, Department of Materials Science and Engineering, and Division of Advanced Materials Science, <sup>b</sup>National Center for Nanomaterials Technology (NCNT), Pohang University of Science and Technology (POSTECH), Pohang 790-784, Republic of Korea; Email : [hmjang@postech.ac.kr](mailto:hmjang@postech.ac.kr)

\*Corresponding author

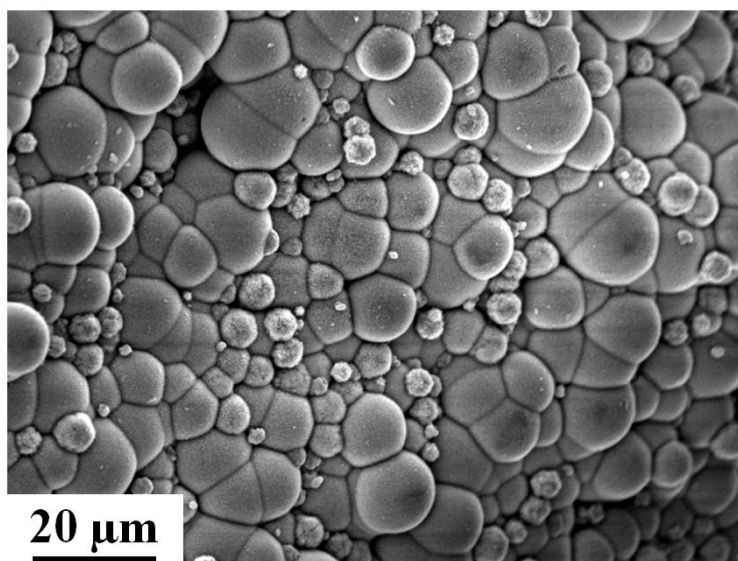

**Figure S1.** The SEM image of the as-synthesized SU TiO<sub>2</sub> without use of ethanol as a dispersing agent.

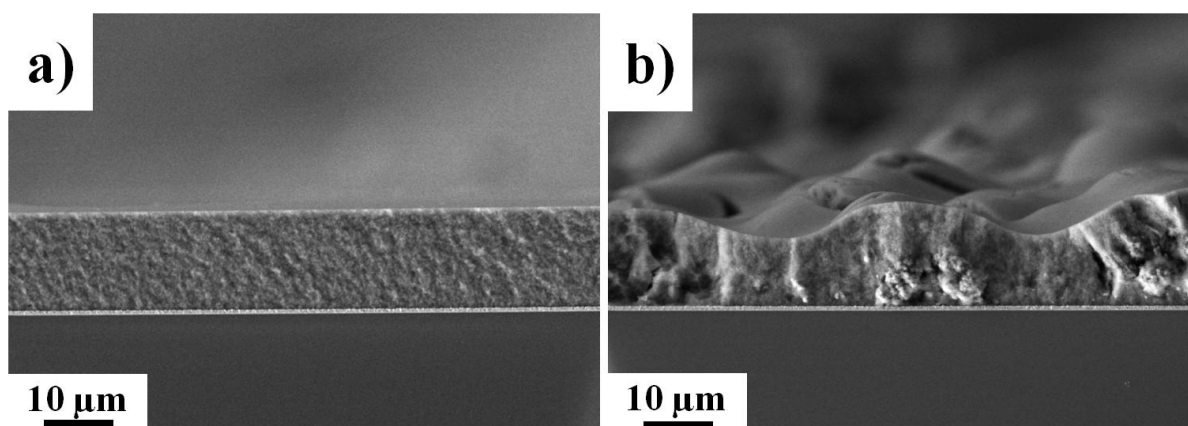

**Figure S2.** SEM images of the two films deposited on the FTO glass. Cross-section images of the NP (a) and SU-NP composite films (NP: 14.5 μm, SU-NP: 14.6 μm).

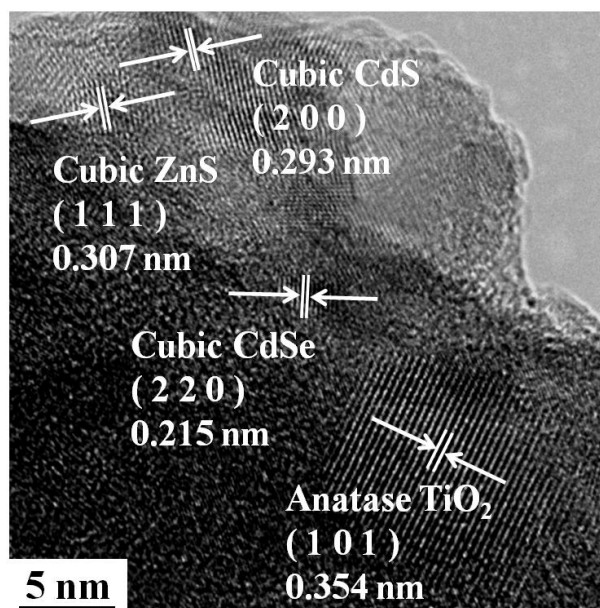

**Figure S3.** STEM image of the sensitized TiO<sub>2</sub> particles containing the CdS QDs formed on the ZnS layer due to residual Cd<sup>2+</sup> ions.

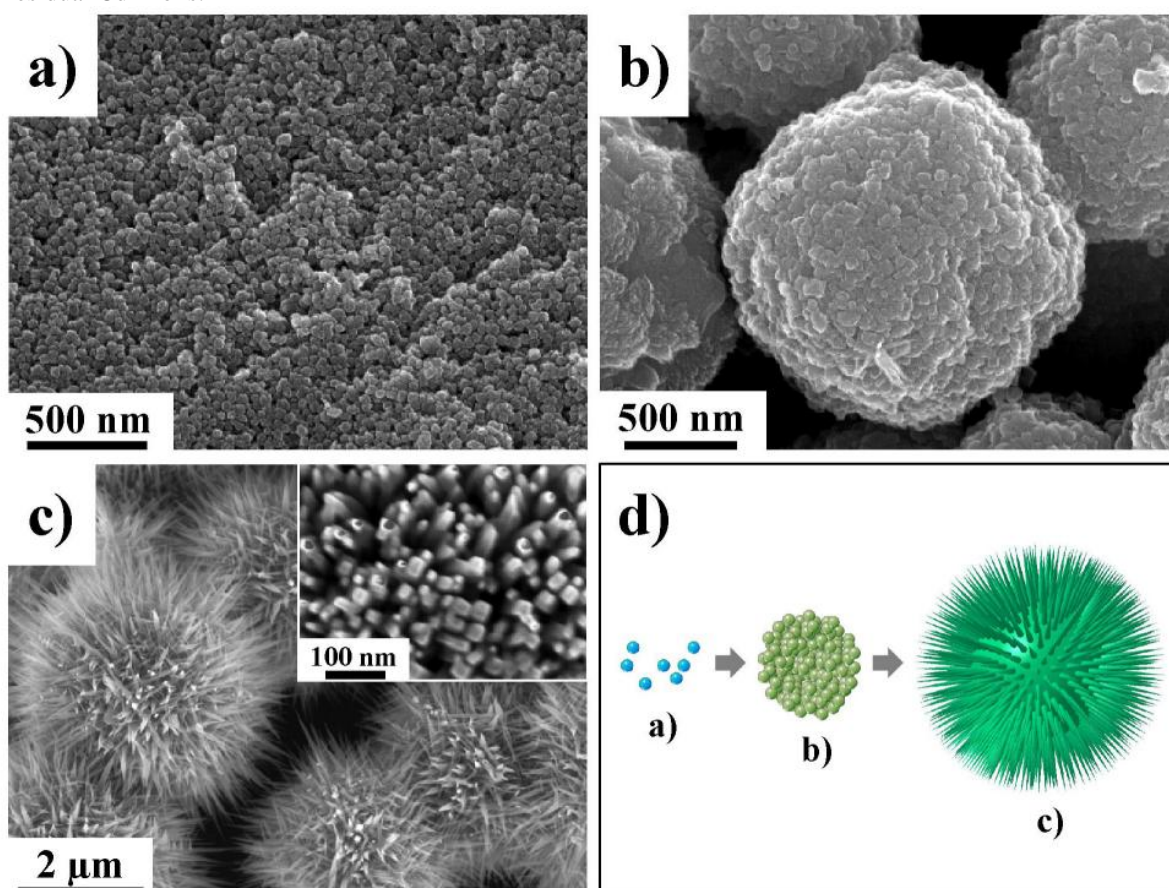

**Figure S4.** SEM images of as-prepared SU TiO<sub>2</sub> at different reaction time: 30 min (a), 1 h (b), 4 h (c), and schematic illustration of the formation mechanism of SU TiO<sub>2</sub> (d). The inset of (c) shows the top view image of nanoneedles grown on a single SU TiO<sub>2</sub> particle.

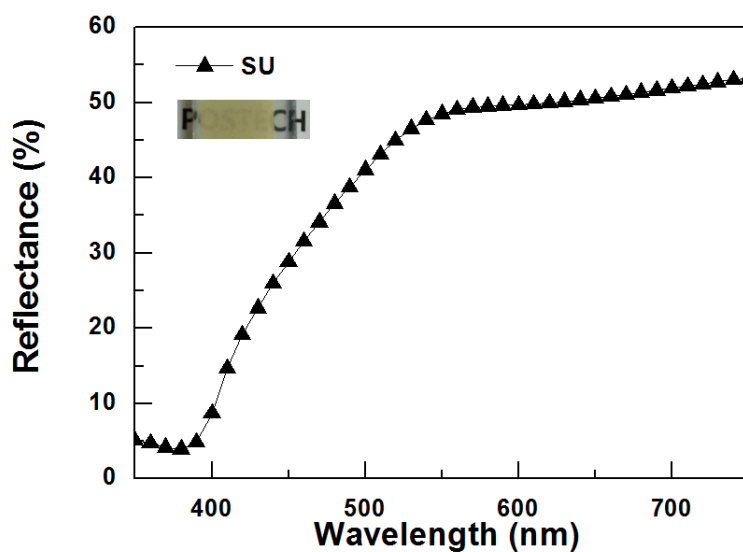

**Figure S5.** Diffuse reflectance spectra of the SU film. The inset is the top-view image of the photoanode.

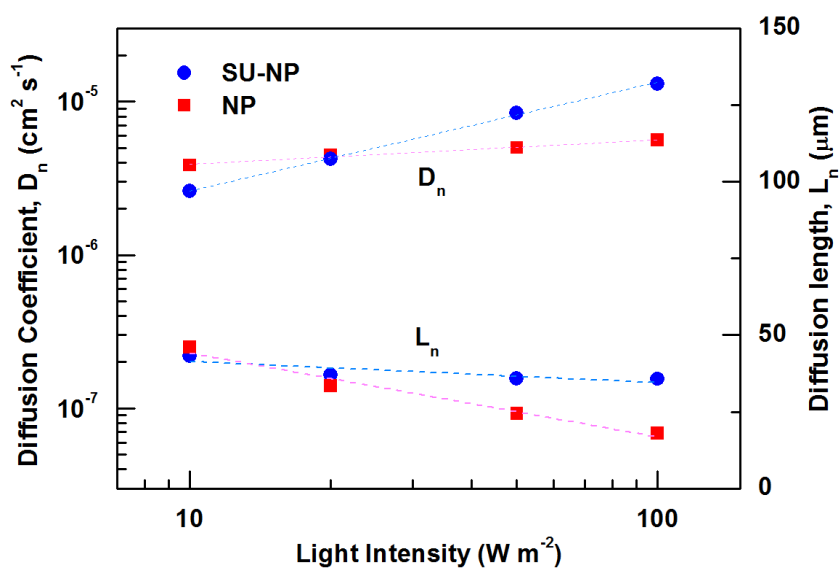

**Figure S6.** Incident light intensity dependent electron diffusion coefficient and effective diffusion length for the QDSSCs based on the SU-NP composite and the NP films under 625 nm LED illumination (AM 1.5, 100 mW  $cm^{-2}$ ).

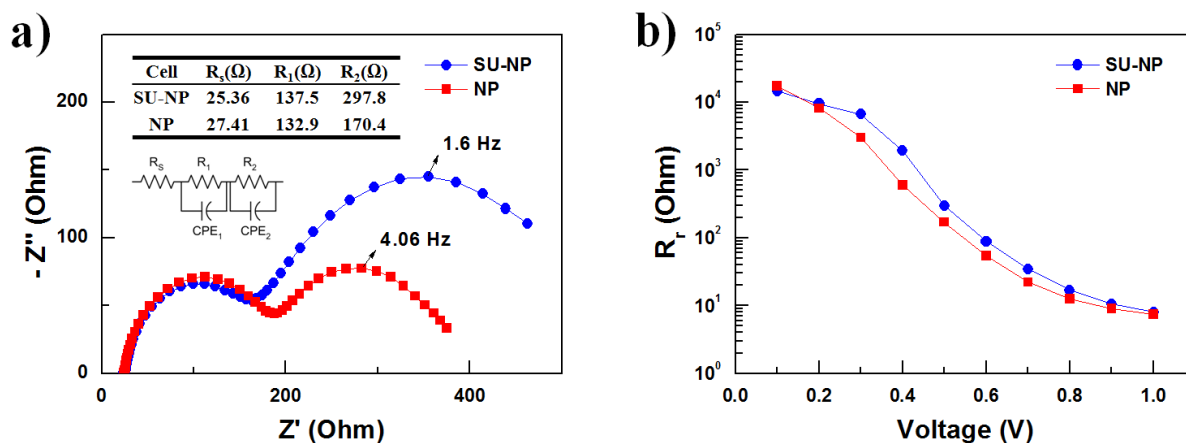

**Figure S7.** (a) Nyquist plots of the EIS spectra (applied voltage : 0.5 V) and (b) charge recombination resistance for the CdS/CdSe/ZnS QDSSCs with the SU-NP composite and the NP films under dark. The corresponding equivalent circuit and values of fitting parameters are present.

Typical Nyquist plots of both cells were obtained under dark using the equivalent circuit shown in the inset of Fig. S7a. It is known that the second semi-arc at a lower frequency region is related to the recombination resistance ( $R_r$ ) between the oxide and the polysulphide electrolyte<sup>1</sup>. The electron life time ( $\tau_r$ ) is given by  $1/\omega_{max}$ , where  $\omega_{max}$  refers to the peak frequency of the second semi-arc<sup>2</sup>.  $\omega_{max}$  of the ODSSC cell composed of the SU-NP cell is 1.6 Hz which is about 2.54 times smaller than that of the QDSSC cell with the NP cell (4.06 Hz) under a dark condition at applied voltage of 0.5 V. Accordingly,  $\tau_r$  is estimated to be 625 and 246 ms for the SU-NP and the NP cells, respectively. Fig. S7b shows  $R_r$  for both cells which decreases with an increasing applied voltage<sup>1</sup>. It is observed that the SU-NP cell has higher  $R_r$  than the NP cell at various applied voltages. This result implies that the recombination is greatly suppressed at the SU  $\text{TiO}_2$ /polysulphide electrolyte interface, which offers a higher  $V_{oc}$ ,  $J_{sc}$  and improved conversion efficiency.

## Reference

1. I. Mora-Sero, S. Gimenez, F. Fabregat-Santiago, R. Gomez, Q. Shen, T. Toyoda and J. Bisquert, *Accounts Chem Res*, 2009, **42**, 1848.
2. R. Kern, R. Sastrawan, J. Ferber, R. Stangl and J. Luther, *Electrochim Acta*, 2002, **47**, 4213.
